# Supplementary material for: Arabinofuranosyl Thymine Derivatives—Potential Candidates against Cowpox Virus: A Computational Screening Study
Source: MDPI journal article supplement (doi:10.3390/ijms24021751), 2023-01-16
Supplement: s1 [file s1]

**Table S1.** Thymine-related structures were used in the study.

| Structures           | PubChem ID |
|----------------------|------------|
| Cidofovir (Standard) | 60613      |
| (1)                  | 65049      |
| (2)                  | 11243988   |
| (3)                  | 123370001  |
| (4)                  | 129802452  |
| (5)                  | 154137224  |
| (6)                  | 191372     |
| (7)                  | 21308117   |
| (8)                  | 451892     |
| (9)                  | 59119818   |
| (10)                 | 90413362   |
| (11)                 | 90413364   |
| (12)                 | 1135       |
| (13)                 | 566009     |
| (14)                 | 78957      |
| (15)                 | 667607     |
| (16)                 | 330104     |
| (17)                 | 78112      |
| (18)                 | 3385       |
| (19)                 | 348851     |
| (20)                 | 69672      |
| (21)                 | 163114065  |

**Table S2.** Generated pharmacophore models with scores

| Pharmacophore models | Score (0-1) |
|----------------------|-------------|
| Model-1              | 0.8320      |
| Model-2              | 0.8163      |
| Model-3              | 0.8064      |
| Model-4              | 0.8033      |
| Model-5              | 0.7995      |
| Model-6              | 0.7994      |
| Model-7              | 0.7909      |
| Model-8              | 0.7908      |
| Model-9              | 0.7850      |
| Model-10             | 0.7722      |
